# Supplementary material for: Chemical Composition of Essential Oil from Flower of ‘Shanzhizi’ (Gardenia jasminoides Ellis) and Involvement of Serotonergic System in Its Anxiolytic Effect
Source: MDPI journal article supplement (doi:10.3390/molecules25204702), 2020-10-14
Supplement: s1 [file s1]

# Chemical Composition of Essential Oil from Flower of 'Shanzhizi' (*Gardenia jasminoides* Ellis) and Involvement of Serotonergic System in Its Anxiolytic Effect

Nan Zhang <sup>1</sup>, Mu Luo <sup>1</sup>, Lei He <sup>2</sup> and Lei Yao <sup>1,\*</sup>

<sup>1</sup> Department of Landscape Architecture, School of Design, Shanghai Jiao Tong University, 800 Dong Chuan Road, Shanghai 200241, China; fxzwzhangnan@sjtu.edu.cn (N.Z.); reverie@sjtu.edu.cn (M.L.)

<sup>2</sup> Department of Resources and Environment, School of Agriculture and Biology, Shanghai Jiao Tong University, 800 Dong Chuan Road, Shanghai 200241, China; 018150910007@sjtu.edu.cn

\* Correspondence: yaolei@sjtu.edu.cn; Tel./Fax: +86-21-34206606

## Supplementary Materials

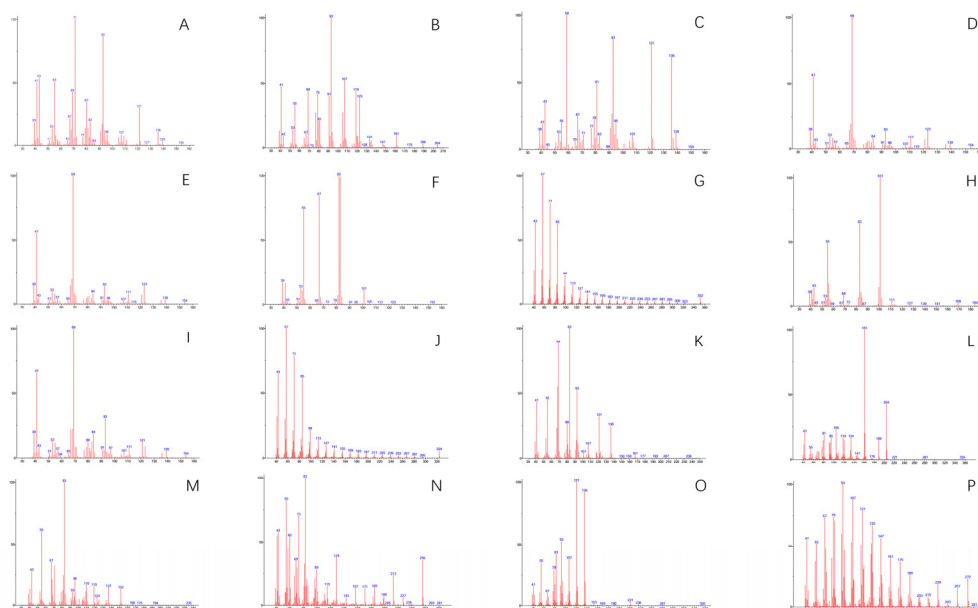

**Figure S1.** The MS data of 16 main components in the essential oil of *Gardenia jasminoides*. A, linalool; B,  $\alpha$ -farnesene; C,  $\alpha$ -terpineol; D, geraniol; E, cembrene A; F, cis-3-hexenyl tiglate; G, pentacosane; H, hexyl tiglate; I, nerol; J, tricosane; K, geranyl angelate; L, tau.-cadinol; M, 8-hydroxylinalool; N, n-hexadecanoic acid; O,  $\alpha$ -terpinyl acetate; P, verticilol.
